# Supplementary material for: Treatment with Botulinum toxin A in a total population of children with cerebral palsy - a retrospective cohort registry study
Source: PubMed Central journal article supplement (PMC5725838; doi:10.1186/s12891-017-1880-y), 2017-12-11
Supplement: 12891_2017_1880_MOESM1_ESM.pdf [file 12891_2017_1880_MOESM1_ESM.pdf]

| <b>Combination of muscles injected with BTX-A</b>                                       | <b>Number of treatments (n=776)</b> |
|-----------------------------------------------------------------------------------------|-------------------------------------|
| gastrocnemius                                                                           | 266                                 |
| gastrocnemius+hamstrings                                                                | 99                                  |
| gastrocnemius+hamstrings+adductors                                                      | 53                                  |
| gastrocnemius+tibialis posterior                                                        | 52                                  |
| hamstrings+adductors                                                                    | 49                                  |
| gastrocnemius+adductors                                                                 | 40                                  |
| hamstrings                                                                              | 38                                  |
| adductors                                                                               | 23                                  |
| gastrocnemius+hamstrings+gracilis                                                       | 8                                   |
| gastrocnemius+hamstrings+tibialis posterior                                             | 8                                   |
| hamstrings+adductors +psoas major                                                       | 7                                   |
| gastrocnemius+hamstrings+adductors+upper extremity                                      | 6                                   |
| gastrocnemius+hamstrings+adductors+tibialis posterior                                   | 5                                   |
| gastrocnemius+upper extremity,                                                          | 5                                   |
| gastrocnemius+adductors+psoas major                                                     | 4                                   |
| gastrocnemius+hamstrings+adductors+psoas major                                          | 4                                   |
| hamstrings+adductors+rectus femoris                                                     | 4                                   |
| gastrocnemius+adductors+upper extremity                                                 | 4                                   |
| hamstrings+gluteus maximus                                                              | 3                                   |
| gastrocnemius+gracilis                                                                  | 3                                   |
| psoas major                                                                             | 3                                   |
| adductors+rectus femoris                                                                | 3                                   |
| hamstrings+adductors+rectus femoris                                                     | 3                                   |
| gastrocnemius+hamstrings+upper extremity                                                | 3                                   |
| hamstrings+adductors+upper extremity+rectus femoris                                     | 3                                   |
| hamstring+gracilis                                                                      | 2                                   |
| gastrocnemius+hamstrings+psoas major                                                    | 2                                   |
| gastrocnemius+rectus femoris                                                            | 2                                   |
| gastrocnemius+hamstrings+adductors+rectus femoris+psoas major                           | 2                                   |
| adductors+rectus femoris                                                                | 2                                   |
| tibialis posterior                                                                      | 2                                   |
| gastrocnemius+adductors+tibialis posterior                                              | 2                                   |
| hamstrings+upper extremity                                                              | 2                                   |
| adductors+upper extremity+psoas major                                                   | 2                                   |
| gastrocnemius+upper extremity+tibialis posterior                                        | 2                                   |
| gastrocnemius+extensor hallucis longus                                                  | 1                                   |
| gastrocnemius+hamstrings+adductors+flexor hallucis longus,                              | 1                                   |
| gastrocnemius+flexor hallucis longus                                                    | 1                                   |
| gastrocnemius+adductors+flexor hallucis longus                                          | 1                                   |
| gastrocnemius+hamstrings+flexor hallucis longus                                         | 1                                   |
| gastrocnemius+hamstrings+adductors+flexor hallucis longus+psoas major+tibialis anterior | 1                                   |
| adductors+gluteus maximus                                                               | 1                                   |
| gastrocnemius+hamstrings+gluteus maximus                                                | 1                                   |
| gracilis+rectus femoris                                                                 | 1                                   |

|                                                                                           |    |
|-------------------------------------------------------------------------------------------|----|
| gracilis+rectus femoris+flexor hallucis longus+psoas major                                | 1  |
| hamstrings+psoas major                                                                    | 1  |
| gastrocnemius+psoas major                                                                 | 1  |
| hamstring+rectus femoris+gluteus maximus                                                  | 1  |
| gastrocnemius+hamstrings+rectus femoris                                                   | 1  |
| hamstrings+adductors+tibialis anterior                                                    | 1  |
| gastrocnemius+hamstrings+tibialis anterior                                                | 1  |
| tibialis posterior+extensor hallucis longus                                               | 1  |
| gastrocnemius +tibialis posterior+gracilis                                                | 1  |
| gastrocnemius+hamstrings+tibialis posterior+gracilis                                      | 1  |
| hamstrings+tibialis posterior+gracilis+psoas major                                        | 1  |
| gastrocnemius+tibialis posterior+psoas major                                              | 1  |
| gastrocnemius+tibialis posterior+rectus femoris+psoas major                               | 1  |
| hamstrings+adductors+tibialis posterior+rectus femoris+psoas major                        | 1  |
| hamstrings+adductors+upper extremity+flexor hallucis longus                               | 1  |
| gastrocnemius+hamstrings+adductors+upper extremity+flexor hallucis longus                 | 1  |
| hamstrings+adductors+upper extremity+flexor hallucis longus+psoas major+tibialis anterior | 1  |
| adductors+upper extremity+gluteus maximus                                                 | 1  |
| gastrocnemius+hamstrings+upper extremity+gracilis                                         | 1  |
| hamstrings+adductors+upper extremity+psoas major                                          | 1  |
| gastrocnemius+hamstrings+adductors+upper extremity+psoas major+tibialis anterior          | 1  |
| adductors+upper extremity+rectus femoris                                                  | 1  |
| hamstrings+upper extremity+rectus femoris                                                 | 1  |
| adductors+upper extremity+tibialis posterior+flexor hallucis longus                       | 1  |
| gastrocnemius+hamstrings+upper extremity+tibialis posterior                               | 1  |
| gastrocnemius+hamstrings+adductors+upper extremity+tibialis posterior                     | 1  |
| missing data                                                                              | 25 |
